# Supplementary material for: A new model for freedom of movement using connectomic analysis
Source: PeerJ. 2022 Aug 11;10:e13602. doi: 10.7717/peerj.13602 (PMC9375968; doi:10.7717/peerj.13602)
Supplement: Supplemental Information 1 — First column, code number for each node as used in Figs. 2 and 4. Second column, full Brainnetome Atlas database name for each node. Third column, processes in which each node is involved. Fourth-ninth columns, raw centrality values for each node according to each criterion as indicated. [file peerj-10-13602-s001.xlsx]

## Sheet: Centrality measures undirected
				Centrality values
	Node#	Name	Task	degree	eigenvector	hubs	authorities	closeness	betweenness
	29	left NAC, nucleus accumbens	Motivation	60	1	1	1	0.00980392	242.804
	30	right NAC, nucleus accumbens	Motivation	55	0.960405	0.960405	0.960405	0.00934579	179.008
	4	right A23d, dorsal area 23	Modulation of Motivation	49	0.924174	0.924174	0.924174	0.00884956	126.172
	3	left A23d, dorsal area 23	Modulation of Motivation	45	0.91538	0.91538	0.91538	0.00854701	41.6202
	6	right A23v, ventral area 23	Modulation of Motivation	51	0.913609	0.913609	0.913609	0.00900901	156.602
	5	left A23v, ventral area 23	Modulation of Motivation	46	0.89059	0.89059	0.89059	0.00862069	64.7326
	53	left A24rv, rostroventral area 24	Planning	41	0.881968	0.881968	0.881968	0.00813008	11.8936
	54	right A24rv, rostroventral area 24	Planning	41	0.875652	0.875652	0.875652	0.00819672	13.9566
	1	left A31, area 31 (Lc1)	Modulation of Motivation	43	0.869562	0.869562	0.869562	0.00840336	41.9589
	37	left A9m,medial area 9	Planning & Decision	42	0.868342	0.868342	0.868342	0.00819672	31.5313
	59	left A32sg, subgenual area 32	Planning	40	0.861341	0.861341	0.861341	0.00806452	12.1449
	57	left A24cd, caudodorsal area 24	Planning	40	0.85988	0.85988	0.85988	0.00806452	13.2616
	39	left A10m, medial area 10	Planning	40	0.853947	0.853947	0.853947	0.00806452	16.386
	40	right A10m, medial area 10	Planning	38	0.837988	0.837988	0.837988	0.00787402	6.88692
	58	right A24cd, caudodorsal area 24	Planning	38	0.837126	0.837126	0.837126	0.0078125	7.01112
	36	right A6m, medial area 6	Planning & Timing	47	0.835257	0.835257	0.835257	0.00862069	78.853
	2	right A31, area 31 (Lc1)	Modulation of Motivation	38	0.827633	0.827633	0.827633	0.00793651	12.3926
	27	left lAmyg, lateral amygdala	Motivation & Agency	45	0.821702	0.821702	0.821702	0.00840336	69.076
	60	right A32sg, subgenual area 32	Planning	37	0.819821	0.819821	0.819821	0.00775194	6.27966
	38	right A9m,medial area 9	Planning & Decision	38	0.818115	0.818115	0.818115	0.0078125	18.4768
	35	left A6m, medial area 6	Planning & Timing	46	0.815425	0.815425	0.815425	0.00854701	73.8952
	55	left A32p, pregenual area 32	Planning	36	0.81458	0.81458	0.81458	0.00775194	3.32132
	7	left A23c, caudal area 23	Modulation of Motivation	37	0.805955	0.805955	0.805955	0.0078125	10.0354
	56	right A32p, pregenual area 32	Planning	35	0.797756	0.797756	0.797756	0.00763359	2.49402
	28	right lAmyg, lateral amygdala	Motivation & Agency	43	0.780538	0.780538	0.780538	0.00826446	76.833
	8	right A23c, caudal area 23	Modulation of Motivation	35	0.776131	0.776131	0.776131	0.00775194	5.81719
	43	left A10l, lateral area10	Planning	40	0.76273	0.76273	0.76273	0.00806452	40.3213
	12	right A11m, medial area 11	Motivation	35	0.759961	0.759961	0.759961	0.0078125	8.79157
	44	right A10l, lateral area10	Planning	39	0.733039	0.733039	0.733039	0.008	49.0341
	25	left mAmyg, medial amygdala	Motivation & Agency	36	0.728713	0.728713	0.728713	0.0078125	26.7112
	71	left A4ll, area 4, (lower limb region)	Execution	37	0.723007	0.723007	0.723007	0.00787402	29.5277
	72	right A4ll, area 4, (lower limb region)	Execution	37	0.713803	0.713803	0.713803	0.00793651	31.6424
	31	left A9l, lateral area 9	Planning & Timing	36	0.682359	0.682359	0.682359	0.00775194	43.2111
	32	right A9l, lateral area 9	Planning & Timing	33	0.673569	0.673569	0.673569	0.0075188	24.555
	11	left A11m, medial area 11	Motivation	30	0.672896	0.672896	0.672896	0.00735294	3.89423
	26	right mAmyg, medial amygdala	Motivation & Agency	30	0.661823	0.661823	0.661823	0.00746269	4.55866
	15	left vIa, ventral agranular insula	Motivation & Agency	35	0.619501	0.619501	0.619501	0.00775194	54.6811
	68	right A4t, area 4 (trunk region)	Execution	33	0.57074	0.57074	0.57074	0.00769231	33.6338
	19	left vId/vIg, ventral dysgranular and granular insula	Motivation & Agency	36	0.552494	0.552494	0.552494	0.0078125	96.4425
	16	right vIa, ventral agranular insula	Motivation & Agency	32	0.50504	0.50504	0.50504	0.00757576	43.1454
	67	left A4t, area 4 (trunk region)	Execution	29	0.496176	0.496176	0.496176	0.00740741	25.7261
	20	right vId/vIg, ventral dysgranular and granular insula	Motivation & Agency	34	0.482804	0.482804	0.482804	0.00769231	100.981
	34	right A6dl, dorsolateral area 6	Planning & Timing	26	0.382772	0.382772	0.382772	0.00719424	22.7858
	9	left A11l, lateral area 11	Motivation	17	0.356873	0.356873	0.356873	0.00662252	1.87692
	23	left dId, dorsal dysgranular insula	Motivation & Agency	25	0.349808	0.349808	0.349808	0.00680272	20.0599
	65	left A4ul, area 4 (upper limb region)	Execution	22	0.334102	0.334102	0.334102	0.00671141	14.4935
	33	left A6dl, dorsolateral area 6	Planning	24	0.327651	0.327651	0.327651	0.00680272	17.1086
	17	left dIa, dorsal agranular insula	Motivation & Agency	22	0.314389	0.314389	0.314389	0.00657895	13.4484
	10	right A11l, lateral area 11	Motivation	18	0.307415	0.307415	0.307415	0.00680272	7.87001
	63	left A4hf, area 4 (head and face region)	Execution	23	0.290422	0.290422	0.290422	0.00675676	22.8464
	64	right A4hf, area 4 (head and face region)	Execution	23	0.288667	0.288667	0.288667	0.00680272	25.992
	66	right A4ul, area 4 (upper limb region)	Execution	21	0.282456	0.282456	0.282456	0.00675676	14.9972
	70	right A4tl, area 4 (tongue and larynx region)	Execution	22	0.279198	0.279198	0.279198	0.00675676	21.6004
	45	left A6cdl, caudal dorsolateral area 6	Planning & Timing	22	0.264576	0.264576	0.264576	0.00684932	24.3402
	47	left A6cvl, caudal ventrolateral area 6	Planning & Timing	24	0.262864	0.262864	0.262864	0.00680272	32.6
	42	right A6vl, ventrolateral area 6	Planning & Timing	22	0.251188	0.251188	0.251188	0.00694444	24.7398
	69	left A4tl, area 4 (tongue and larynx region)	Execution	17	0.241125	0.241125	0.241125	0.00641026	5.90645
	61	left A9/46d, dorsal area 9/46	Timing	15	0.225782	0.225782	0.225782	0.00636943	7.89826
	52	right A40rv, rostroventral area 40 (PFop)	Planning	18	0.223886	0.223886	0.223886	0.00632911	17.3059
	41	left A6vl, ventrolateral area 6	Planning & Timing	19	0.215971	0.215971	0.215971	0.00657895	20.5537
	46	right A6cdl, caudal dorsolateral area 6	Planning & Timing	20	0.214479	0.214479	0.214479	0.00675676	21.0477
	13	left G, hypergranular insula	Motivation & Agency	16	0.211418	0.211418	0.211418	0.00621118	5.05897
	51	left A40rv, rostroventral area 40 (PFop)	Planning	16	0.209228	0.209228	0.209228	0.00645161	16.2796
	48	right A6cvl, caudal ventrolateral area 6	Planning & Timing	18	0.204568	0.204568	0.204568	0.00662252	15.8038
	78	right A39rd, rostrodorsal area 39 (Hip3)	Modulation of Agency	19	0.198303	0.198303	0.198303	0.00689655	44.1413
	18	right dIa, dorsal agranular insula	Motivation & Agency	17	0.196405	0.196405	0.196405	0.00625	8.19838
	81	left V5/MT+, area V5/MT+	Modulation of Agency	12	0.190458	0.190458	0.190458	0.00628931	9.27863
	22	right dIg, dorsal granular insula	Motivation & Agency	15	0.178512	0.178512	0.178512	0.00617284	4.26802
	77	left A39rd, rostrodorsal area 39 (Hip3)	Modulation of Agency	15	0.171677	0.171677	0.171677	0.00653595	21.9108
	14	right G, hypergranular insula	Motivation & Agency	14	0.170672	0.170672	0.170672	0.00609756	3.5015
	24	right dId, dorsal dysgranular insula	Motivation & Agency	14	0.160419	0.160419	0.160419	0.00613497	2.03841
	21	left dIg, dorsal granular insula	Motivation & Agency	13	0.159386	0.159386	0.159386	0.00606061	1.60008
	75	left A39c, caudal area 39 (PGp)	Modulation of Agency	11	0.15576	0.15576	0.15576	0.00625	8.52286
	62	right A9/46d, dorsal area 9/46	Timing	10	0.141093	0.141093	0.141093	0.00591716	3.20103
	82	right V5/MT+, area V5/MT+	Modulation of Agency	10	0.119654	0.119654	0.119654	0.00588235	3.79946
	74	right cpSTS, caudoposterior superior temporal sulcus	Modulation of Agency	13	0.117392	0.117392	0.117392	0.0060241	6.1476
	49	left A40rd, rostrodorsal area 40 (PFt)	Planning	13	0.107836	0.107836	0.107836	0.00568182	4.42739
	79	left A39rv, rostroventral area 39 (PGa)	Modulation of Agency	11	0.106583	0.106583	0.106583	0.0060241	5.93794
	76	right A39c, caudal area 39 (PGp)	Modulation of Agency	9	0.0948422	0.0948422	0.0948422	0.00574713	2.38658
	50	right A40rd, rostrodorsal area 40 (PFt)	Planning	13	0.0839716	0.0839716	0.0839716	0.00546448	13.4122
	73	left cpSTS, caudoposterior superior temporal sulcus	Modulation of Agency	6	0.0386971	0.0386971	0.0386971	0.005	0.434524
	80	right A39rv, rostroventral area 39(PGa)	Modulation of Agency	7	0.0368729	0.0368729	0.0368729	0.00497512	0.878968
