# Supplementary material for: A new model for freedom of movement using connectomic analysis
Source: PeerJ journal article supplement (doi:10.7717/peerj.13602), 2022-08-11

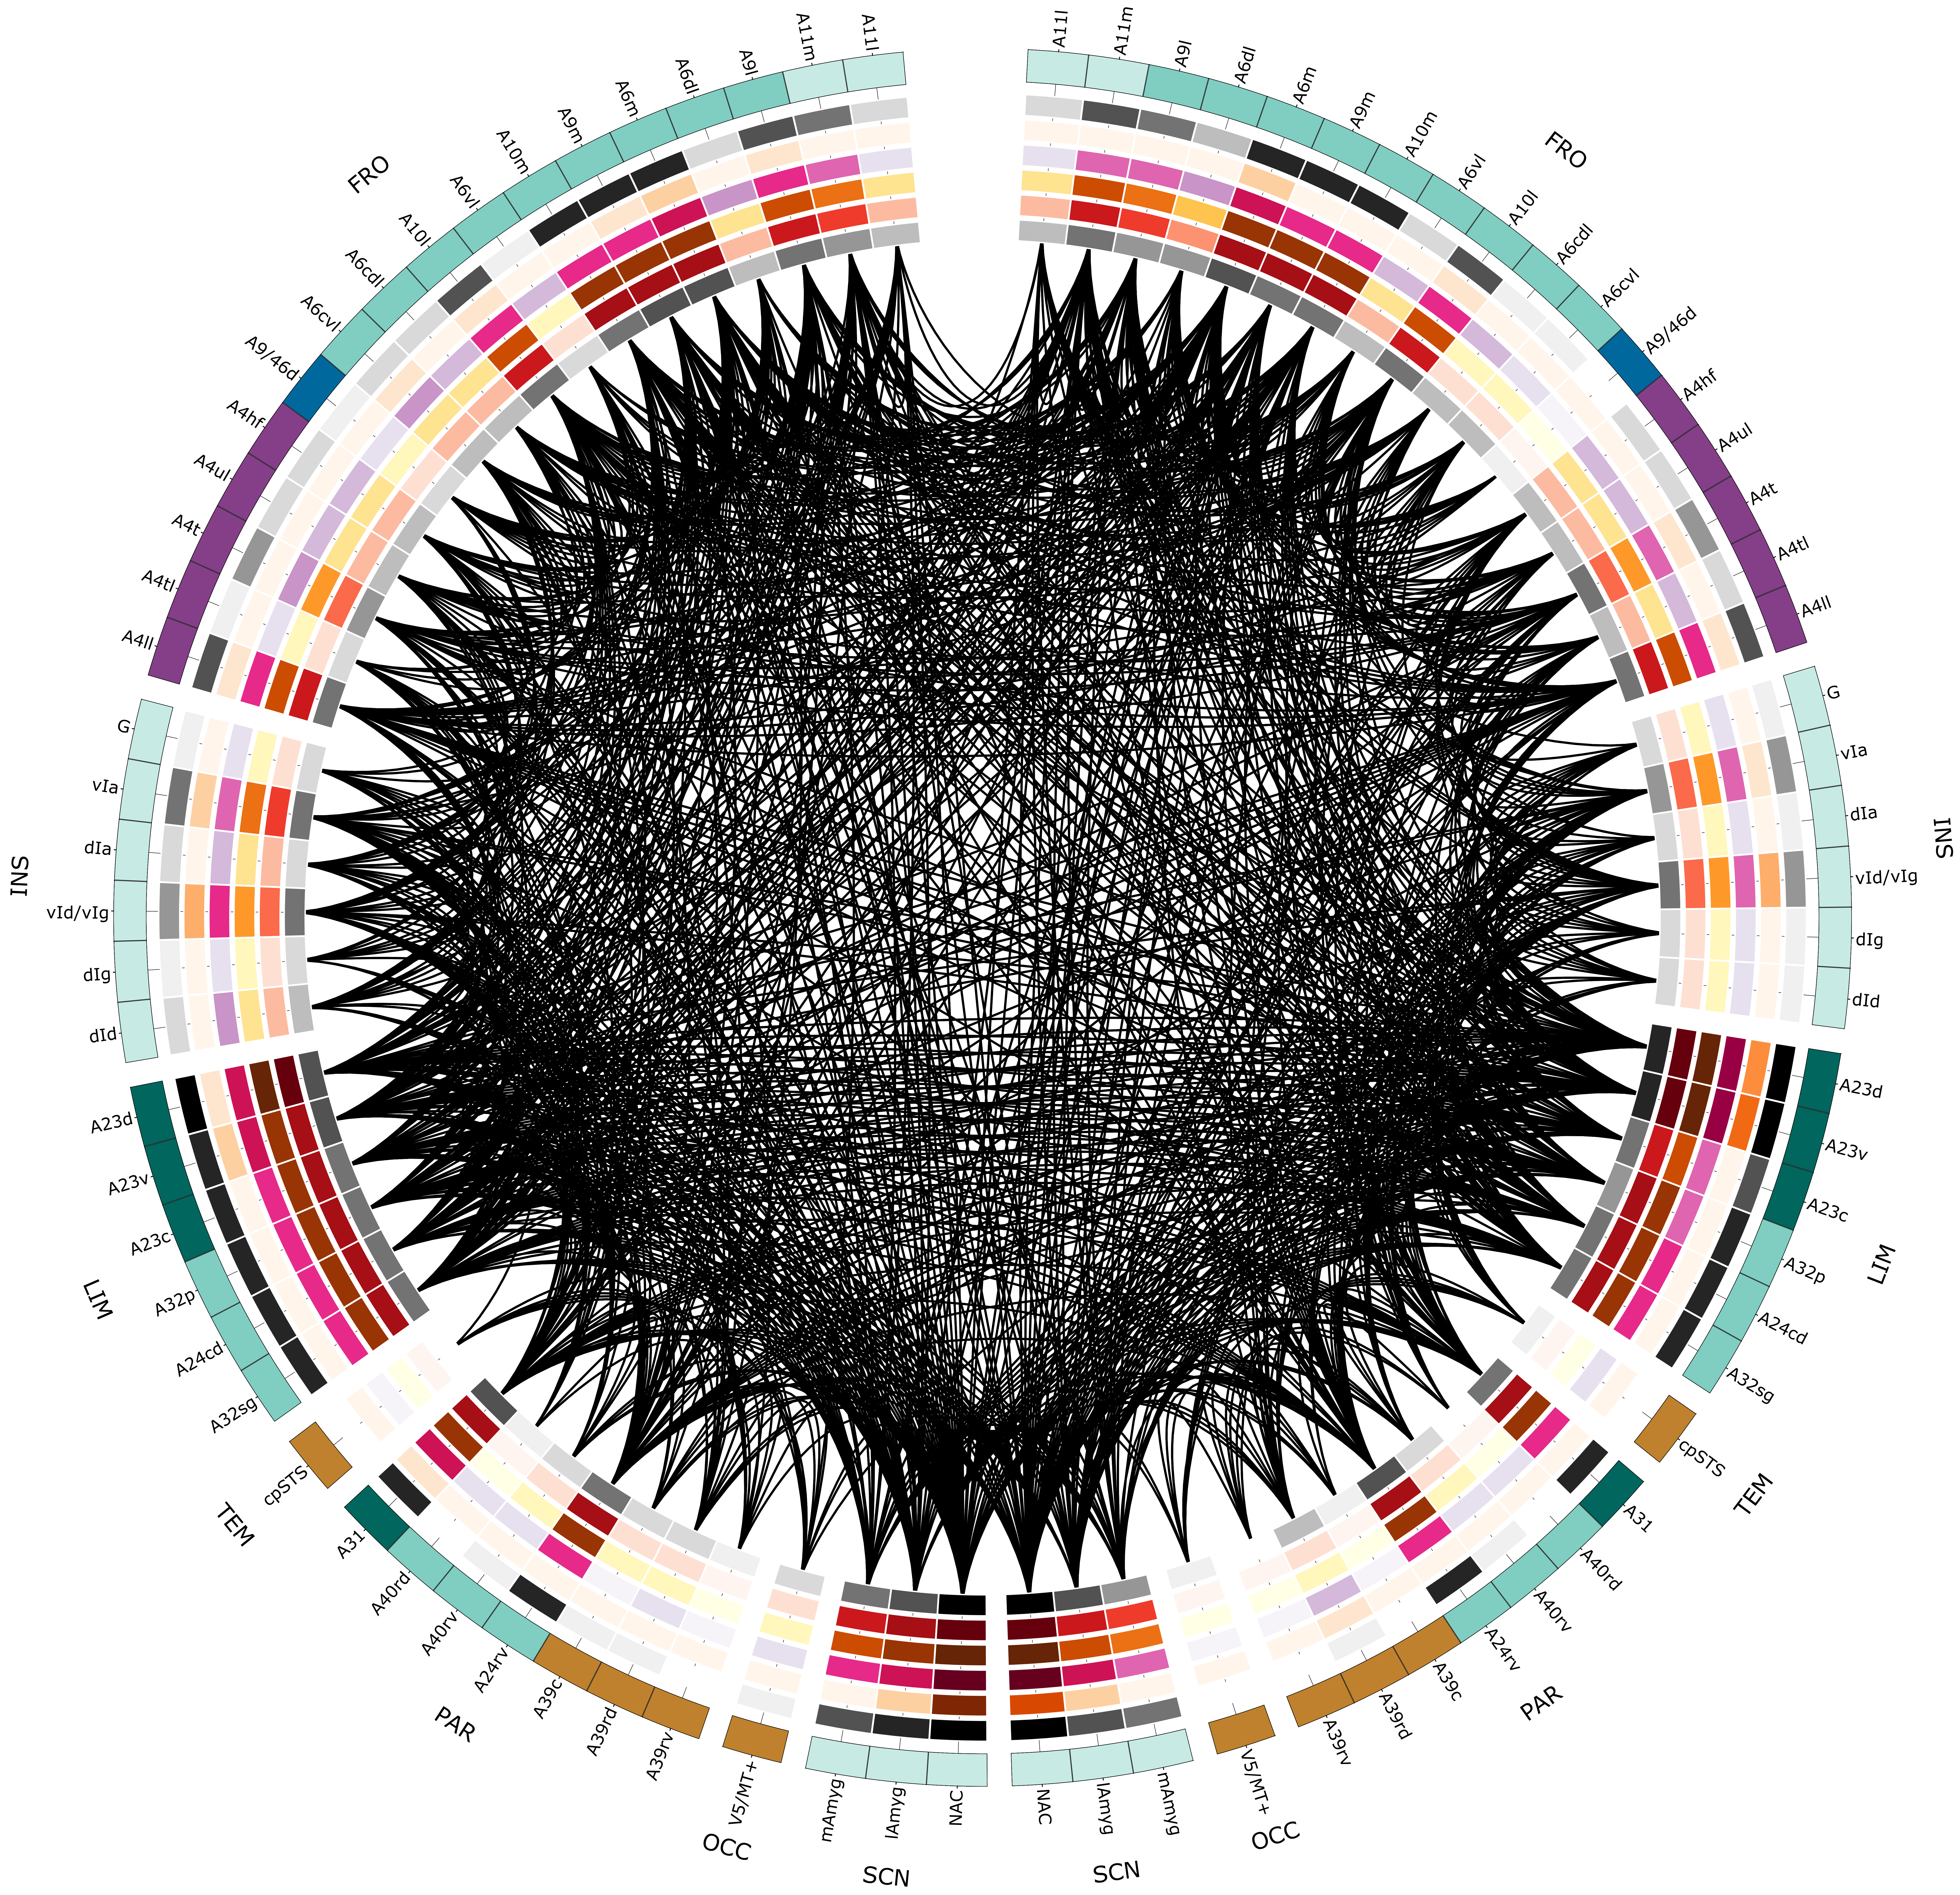

Supplement: Supplementary_Figure_1.pdf [file Supplementary_Figure_1.pdf]
